# Supplementary material
Source: publisher figshare collection journal article supplement (https://sage.figshare.com/ndownloader/files/14427611)
Supplement: Supplementary file 1 [file 14427611]

# Treatment of SPR background in Total internal reflection ellipsometry. Characterization of RNA polymerase II films formation.

Journal Title  
XX(X):??-??  
©The Author(s) 2018  
Reprints and permission:  
sagepub.co.uk/journalsPermissions.nav  
DOI: 10.1177/ToBeAssigned  
www.sagepub.com/  


Dušan Hemzal, Yu Ri Kang, Jan Dvořák, Tomasz Kabzinski, Karel Kubíček, Young Dong Kim and Josef Humlíček

## Supplementary information

**The matrix formalism for light propagation in layered structures.** The propagation of light in a layered structure with planar interfaces produces no diffraction, and can, hence, be described by impact ( $E_i$ ), reflected ( $E_r$ ) and transmitted ( $E_t$ ) wave amplitudes of the electric field using simple matrix formalism:

$$\begin{bmatrix} E_i \\ E_r \end{bmatrix} = (\mathbf{V}_0)^{-1} (\mathbf{R}_1)^{-1} \dots (\mathbf{R}_m)^{-1} \mathbf{V}_f \begin{bmatrix} E_t \\ 0 \end{bmatrix} \equiv \mathbf{P} \begin{bmatrix} E_t \\ 0 \end{bmatrix}, \quad (\text{S1})$$

where matrices  $\mathbf{R}_j$  belong to  $j$ -th layer of the structure and matrices  $\mathbf{V}$  are connected with substrate (index  $_0$ ) and ambient (index  $_f$ ). The expression

$$(\mathbf{R}_j)^{-1} = \begin{pmatrix} \cos \theta_j & -\frac{i \sin \theta_j}{\tilde{n}_j} \\ -i \tilde{n}_j \sin \theta_j & \cos \theta_j \end{pmatrix} \quad (\text{S2})$$

is formally polarization independent (and  $\det \mathbf{R}_j = 1$ ). Note, however, that the definition of  $\tilde{n}_j$  is polarization dependent itself:

$$s : \tilde{n}_j = n_j \cos \varphi_j \quad p : \tilde{n}_j = \frac{n_j}{\cos \varphi_j},$$

where  $n_j$  is the index of refraction of  $j$ -th layer and

$$\cos \varphi_j = \sqrt{1 - \left( \frac{n_0 \sin \varphi}{n_j} \right)^2},$$

with  $\varphi_j$  being an angle at which the  $j$ -th layer is propagated. The phase acquired in a  $j$ -th layer is given by

$$\theta_j = 2\pi \frac{d_j}{\lambda} n_j \cos \phi_j,$$

where  $d_j$  is the thickness of the  $j$ -th layer and  $\lambda$  is the vacuum wavelength of incident light. For the  $\mathbf{V}$  matrices we have

$$s : \mathbf{V}_j = \begin{pmatrix} 1 & 1 \\ \tilde{n}_j & -\tilde{n}_j \end{pmatrix} \quad p : \mathbf{V}_j = \cos \varphi_j \begin{pmatrix} 1 & 1 \\ \tilde{n}_j & -\tilde{n}_j \end{pmatrix}$$

which brings

$$s : (\mathbf{V}_0)^{-1} = -\frac{1}{2\tilde{n}_0} \begin{pmatrix} -\tilde{n}_0 & -1 \\ -\tilde{n}_0 & 1 \end{pmatrix} \quad p : (\mathbf{V}_0)^{-1} = -\frac{1}{2\tilde{n}_0 \cos \varphi_0} \begin{pmatrix} -\tilde{n}_0 & -1 \\ -\tilde{n}_0 & 1 \end{pmatrix}.$$

The overall propagation matrix  $\mathbf{P}$  from eq. (??) allows to compute the complex reflectivity through  $r = P_{21}/P_{11}$  (distinguishing  $r_s$  and  $r_p$  by the appropriate entries of  $\mathbf{P}$  for each of the polarizations) as well as the complex reflectivity ratio

$$\rho = r_p/r_s.$$

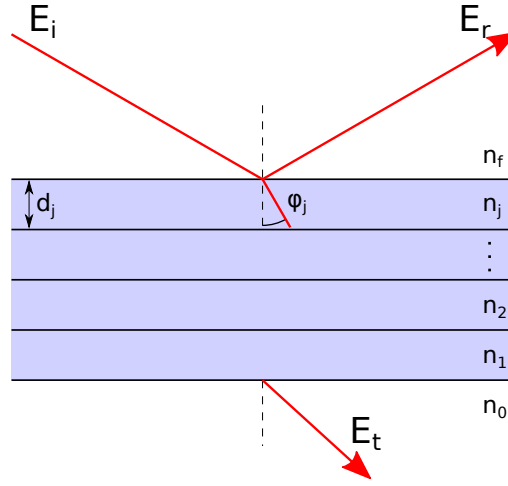

**Figure 1.** Notation for light propagation through a layered structure.

**The difference ellipsometric spectra.** The general propagation matrix from eq. (??) can be decomposed to  $\mathbf{P} = \mathbf{B}\mathbf{V}_f$  via

$$\mathbf{B} = (\mathbf{V}_0)^{-1}(\mathbf{R}_1)^{-1} \dots (\mathbf{R}_m)^{-1}.$$

Then, if another layer, described by matrix  $\mathbf{S}$ , is added on the top of the substrate just below the ambient, the overall propagation matrix gets  $\mathbf{P} = \mathbf{B}\mathbf{S}\mathbf{V}_f$ . In the following, we will gather the (in principle unknown) properties of the substrate into  $\mathbf{B}$  and study only the effect of adding a new layer over this structure.

As the newly added we choose a thin layer of thickness  $t$  and index of refraction  $n$  (the light will propagate through the layer at angle  $\phi$ ) with  $(\mathbf{R}^{-1})_{\text{thin}} \equiv \mathbf{S}$ , where

$$\mathbf{S} \approx \begin{pmatrix} 1 & -\frac{i}{\tilde{n}} \frac{2\pi}{\lambda} nt \cos \phi \\ -i\tilde{n} \frac{2\pi}{\lambda} nt \cos \phi & 1 \end{pmatrix}$$

can be obtained using Taylor expansion with respect to  $t/\lambda$  of eq. (??).

We will now consider two measurements in terms of the complex reflectance ratio  $\rho = \tan \Psi \exp(i\Delta)$  produced: the background measurement  $\rho_0$  without the additional layer and the sample measurement  $\rho$  with the additional layer. If we denote the components of  $\mathbf{B}$  according to

$$s : \mathbf{B} \equiv \begin{pmatrix} a_s & b_s \\ c_s & d_s \end{pmatrix} \quad p : \mathbf{B} \equiv \begin{pmatrix} a_p & b_p \\ c_p & d_p \end{pmatrix},$$

then one obtains

$$\rho_0 = \frac{(d_p n_f + c_p \cos \phi_f)(a_s + b_s n_f \cos \phi_f)}{(b_p n_f + a_p \cos \phi_f)(c_s + d_s n_f \cos \phi_f)}$$

with

$$\Psi_0 = \arctan \left| \frac{(d_p n_f + c_p \cos \phi_f)(a_s + b_s n_f \cos \phi_f)}{(b_p n_f + a_p \cos \phi_f)(c_s + d_s n_f \cos \phi_f)} \right| \quad \Delta_0 = \text{Arg} \left( \frac{(d_p n_f + c_p \cos \phi_f)(a_s + b_s n_f \cos \phi_f)}{(b_p n_f + a_p \cos \phi_f)(c_s + d_s n_f \cos \phi_f)} \right)$$

and

$$\rho = \frac{(a_s + n_f b_s \cos \phi_f - 2\pi i n_f^2 \frac{t}{\lambda} b_s \cos^2 \phi - 2\pi i n_f \frac{t}{\lambda} a_s \cos \phi_f) (d_p n_f + c_p \cos \phi_f - 2\pi i n_f^2 \frac{t}{\lambda} d_p \cos \phi_f - 2\pi i n_f \frac{t}{\lambda} c_p \cos^2 \phi)}{(c_s + n_f d_s \cos \phi_f - 2\pi i n_f^2 \frac{t}{\lambda} d_s \cos^2 \phi - 2\pi i n_f \frac{t}{\lambda} c_s \cos \phi_f) (b_p n_f + a_p \cos \phi_f - 2\pi i n_f^2 \frac{t}{\lambda} b_p \cos \phi_f - 2\pi i n_f \frac{t}{\lambda} a_p \cos^2 \phi)}.$$

As before,  $\Psi = \arctan |\rho|$  and  $\Delta = \text{Arg} \rho$  and one can perform the Taylor expansion with respect to  $t/\lambda$ . Of course,  $\rho|_{t/\lambda \rightarrow 0} = \rho_0$ , and we will limit ourselves to linear expansion.

Consequently, in case of  $\Psi$  to treat the derivative with complex numbers right, we use  $|\rho| = \sqrt{\rho \rho^*}$ , where  $*$  denotes complex conjugation, and write

$$[\arctan \sqrt{\rho \rho^*}]' = \frac{1}{1 + |\rho|^2} \frac{\rho' \rho^* + \rho \rho'^*}{2|\rho|} = \frac{1}{1 + |\rho|^2} \frac{\text{Re}(\rho' \rho^*)}{|\rho|}.$$

Evaluating now the derivative near zero, one obtains

$$[\arctan \sqrt{\rho \rho^*}]'|_{t/\lambda \rightarrow 0} = \frac{1}{1 + |\rho_0|^2} \frac{1}{|\rho_0|} \text{Re}(\rho' \rho^*)|_{t/\lambda \rightarrow 0},$$

where

$$(\rho' \rho^*)|_{t/\lambda \rightarrow 0} = -2\pi i \left[ \frac{\frac{b_s n^2 \cos^2 \phi + a_s n_f \cos \phi_f}{a_s + b_s n_f \cos \phi_f} + \frac{d_p n^2 \cos \phi_f + c_p n_f \cos^2 \phi}{d_p n_f + c_p \cos \phi_f} - \frac{\frac{d_s n^2 \cos^2 \phi + c_s n_f \cos \phi_f}{c_s + d_s n_f \cos \phi_f} - \frac{b_p n^2 \cos \phi_f + a_p n_f \cos^2 \phi}{b_p n_f + a_p \cos \phi_f}}{b_p n_f + a_p \cos \phi_f} \right] |\rho_0|^2.$$

Denoting now

$$\begin{aligned} A &= (d_p n^2 \cos \phi_f + c_p n_f \cos^2 \phi)(a_s + b_s n_f \cos \phi_f) + (b_s n^2 \cos^2 \phi + a_s n_f \cos \phi_f)(d_p n_f + c_p \cos \phi_f) \\ E &= (b_p n^2 \cos \phi_f + a_p n_f \cos^2 \phi)(c_s + d_s n_f \cos \phi_f) + (d_s n^2 \cos^2 \phi + c_s n_f \cos \phi_f)(b_p n_f + a_p \cos \phi_f). \\ A_0 &= (d_p n_f + c_p \cos \phi_f)(a_s + b_s n_f \cos \phi_f) \\ E_0 &= (b_p n_f + a_p \cos \phi_f)(c_s + d_s n_f \cos \phi_f), \end{aligned}$$

one can write  $\rho_0 = A_0/E_0$  and

$$\operatorname{Re}(\rho' \rho^*)|_{t/\lambda \rightarrow 0} = 2\pi \operatorname{Re} \left( -i \left[ \frac{A}{A_0} - \frac{E}{E_0} \right] \right) |\rho_0|^2 = 2\pi \operatorname{Im} \left( \frac{A}{A_0} - \frac{E}{E_0} \right) |\rho_0|^2,$$

so that we arrive to

$$\Psi = \Psi_0 + 2\pi \operatorname{Im} \left( \frac{A}{A_0} - \frac{E}{E_0} \right) \frac{|\rho_0|}{1 + |\rho_0|^2} \frac{t}{\lambda} + \dots$$

Please note that  $A_0$  and  $E_0$  are introduced for convenience only and have no physical interpretation; in particular, they do not coincide with  $r_p$  and  $r_s$ .

Concerning  $\Delta$ , we use the definition

$$\operatorname{Arg} \rho = \arctan \frac{\operatorname{Im} \rho}{\operatorname{Re} \rho},$$

whence for the purposes of Taylor expansion

$$[\operatorname{Arg} z]' = \frac{1}{1 + \left( \frac{\operatorname{Im} \rho}{\operatorname{Re} \rho} \right)^2} \frac{\operatorname{Re} \rho \operatorname{Im}' \rho - \operatorname{Re}' \rho \operatorname{Im} \rho}{\operatorname{Re}^2 \rho} = \frac{\operatorname{Re} \rho \operatorname{Im}' \rho - \operatorname{Re}' \rho \operatorname{Im} \rho}{|\rho|^2}.$$

Realizing now that  $\operatorname{Re} \rho \operatorname{Im}' \rho - \operatorname{Re}' \rho \operatorname{Im} \rho = \operatorname{Im}(\rho' \rho^*)$  one can make use of the derivation of  $\Psi$  and write

$$\operatorname{Im}(\rho' \rho^*)|_{t/\lambda \rightarrow 0} = 2\pi \operatorname{Im} \left( -i \left[ \frac{A}{A_0} - \frac{E}{E_0} \right] \right) |\rho_0|^2 = -2\pi \operatorname{Re} \left( \frac{A}{A_0} - \frac{E}{E_0} \right) |\rho_0|^2,$$

so that

$$[\operatorname{Arg} z]'_{t/\lambda \rightarrow 0} = -2\pi \operatorname{Re} \left( \frac{A}{A_0} - \frac{E}{E_0} \right),$$

and, finally,

$$\Delta = \Delta_0 - 2\pi \operatorname{Re} \left( \frac{A}{A_0} - \frac{E}{E_0} \right) \frac{t}{\lambda} + \dots$$
